# Supplementary material for: Evaluation of ultra-low input RNA sequencing for the study of human T cell transcriptome
Source: PubMed Central journal article supplement (PMC6559993; doi:10.1038/s41598-019-44902-z), 2019-06-11
Supplement: 41598_2019_44902_MOESM2_ESM.pdf [file 41598_2019_44902_MOESM2_ESM.pdf]

## **Evaluation of ultra-low input RNA sequencing for the study of human T cell transcriptome**

Jingya Wang<sup>+1\*</sup>, Sadiye Amcaoglu Rieder<sup>+2</sup>, Jincheng Wu<sup>\$3</sup>, Susana Hayes<sup>4</sup>, Rebecca Anne Halpin<sup>4</sup>, Melissa de los Reyes<sup>4</sup>, Yashaswi Shrestha<sup>4</sup>, Roland Kolbeck<sup>5</sup> and Rajiv Raja<sup>4</sup>

+ contributed equally

\* Correspondence to wangjin@medimmune.com

1 Translational Science and Experimental Medicine, Early Respiratory, Inflammation and Autoimmunity, R&D Biopharmaceuticals, AstraZeneca, Gaithersburg, USA

2 Biosciences, Early Respiratory, Inflammation and Autoimmunity, R&D Biopharmaceuticals, AstraZeneca, Gaithersburg, USA

3 Research Bioinformatics, MedImmune AstraZeneca, Gaithersburg, USA

4 Translational Medicine, Early Oncology, R&D Oncology, AstraZeneca, Gaithersburg, USA

5 Respiratory, Autoimmune and Inflammation, MedImmune AstraZeneca, Gaithersburg, USA

\$ Current address: Novartis Institutes for BioMedical Research

**Figure S1**

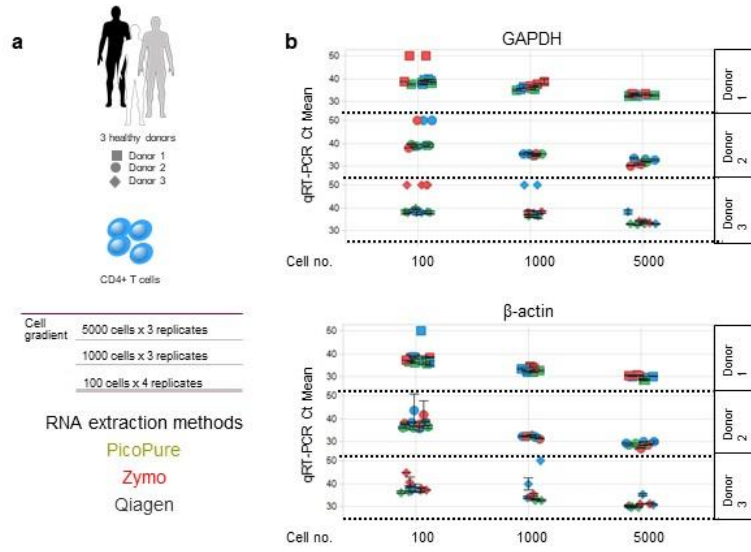

Figure S2

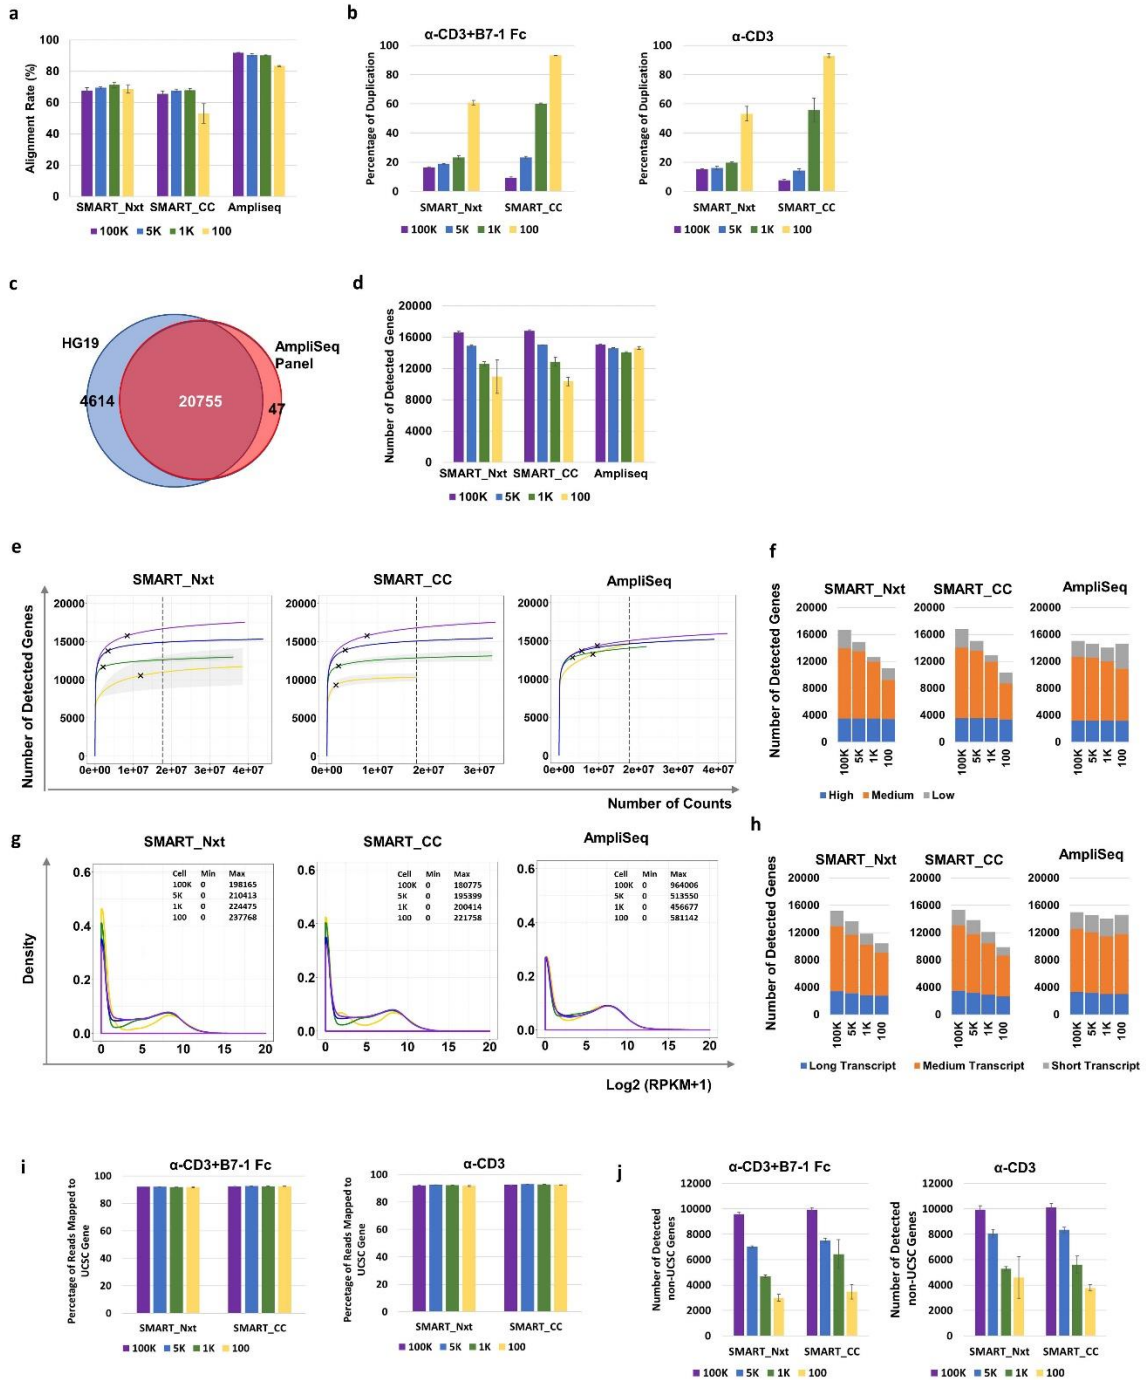

Figure S3

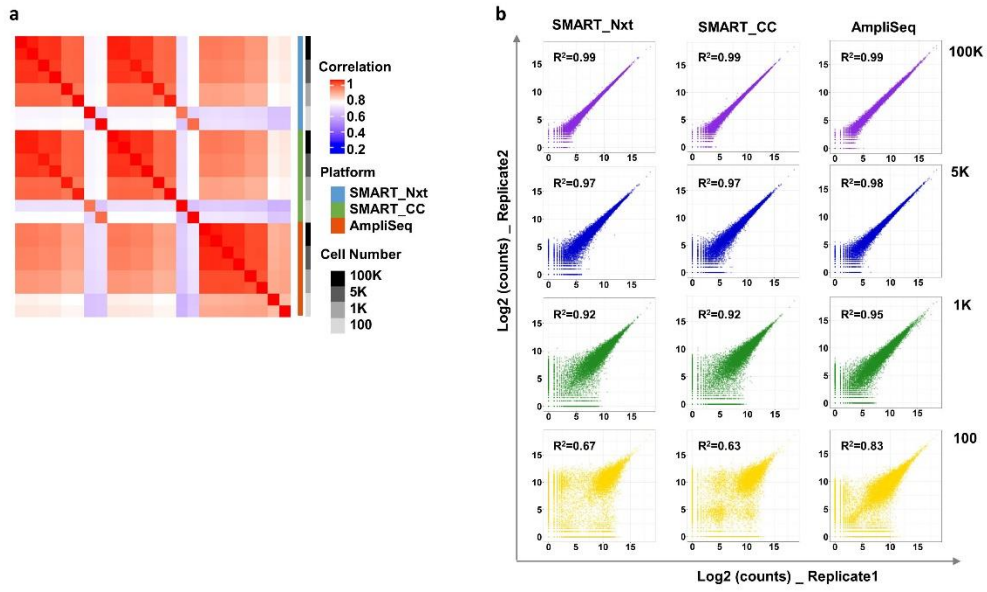

Figure S4

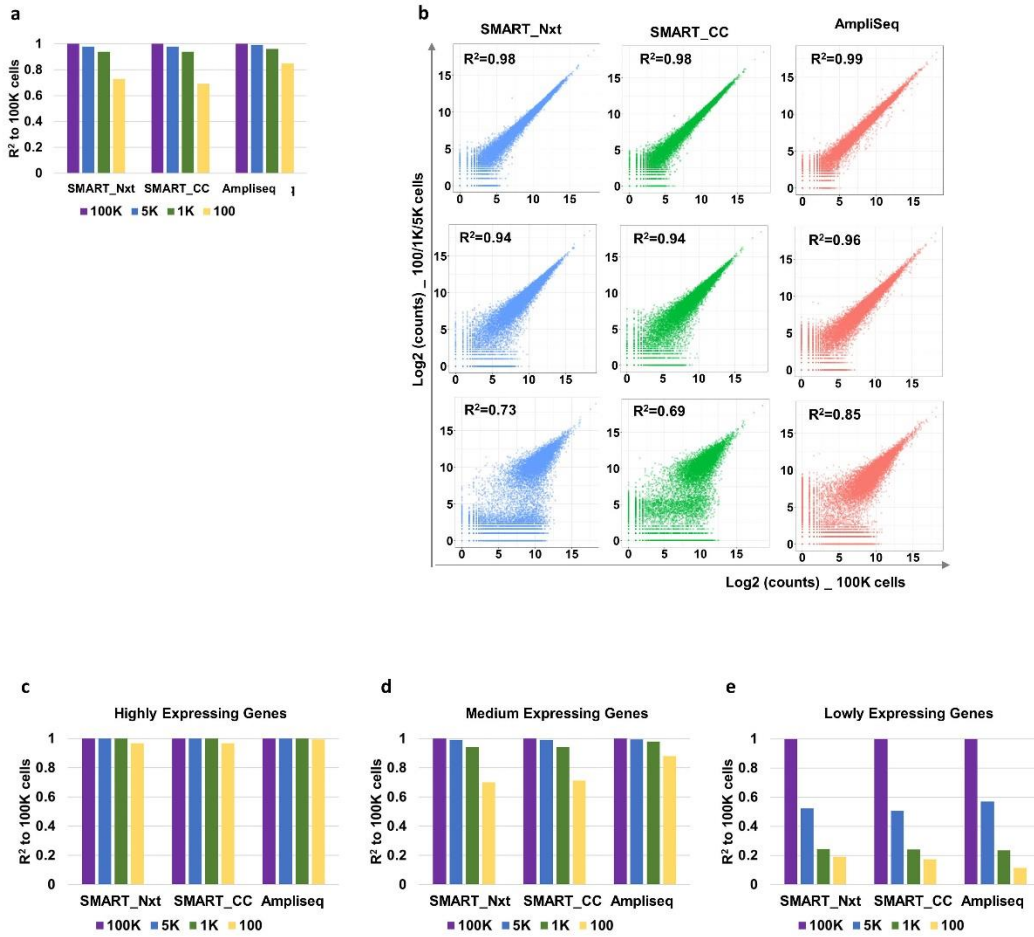

Figure S5

a

|  | SMART_Nxt |      |     |     | SMART_CC |      |     |      | AmpliSeq |      |     |     |
|--|-----------|------|-----|-----|----------|------|-----|------|----------|------|-----|-----|
|  | 7762      | 94%  | 95% | 97% | 86%      | 94%  | 95% | 100% | 69%      | 80%  | 88% | 85% |
|  | 2086      | 2223 | 81% | 44% | 94%      | 88%  | 84% | 38%  | 76%      | 69%  | 60% | 68% |
|  | 463       | 395  | 485 | 41% | 96%      | 80%  | 91% | 24%  | 84%      | 81%  | 50% | 55% |
|  | 33        | 15   | 14  | 34  | 91%      | 44%  | 38% | 76%  | 85%      | 71%  | 44% | 26% |
|  | 6659      | 2092 | 465 | 31  | 7923     | 94%  | 96% | 81%  | 70%      | 80%  | 89% | 83% |
|  | 2144      | 1955 | 390 | 15  | 2152     | 2278 | 84% | 38%  | 76%      | 70%  | 61% | 70% |
|  | 410       | 364  | 393 | 13  | 413      | 361  | 432 | 24%  | 85%      | 82%  | 54% | 52% |
|  | 21        | 8    | 5   | 16  | 17       | 8    | 5   | 21   | 71%      | 52%  | 29% | 19% |
|  | 4616      | 1680 | 408 | 29  | 4656     | 1729 | 369 | 15   | 6662     | 79%  | 93% | 83% |
|  | 3414      | 1539 | 392 | 24  | 3445     | 1589 | 354 | 11   | 3382     | 4289 | 89% | 80% |
|  | 786       | 544  | 243 | 15  | 808      | 547  | 235 | 6    | 844      | 806  | 904 | 63% |
|  | 92        | 73   | 59  | 9   | 90       | 76   | 56  | 4    | 90       | 86   | 68  | 108 |

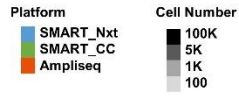

b

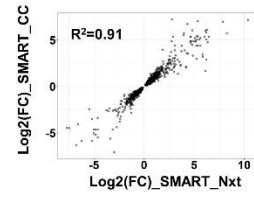

Figure S6

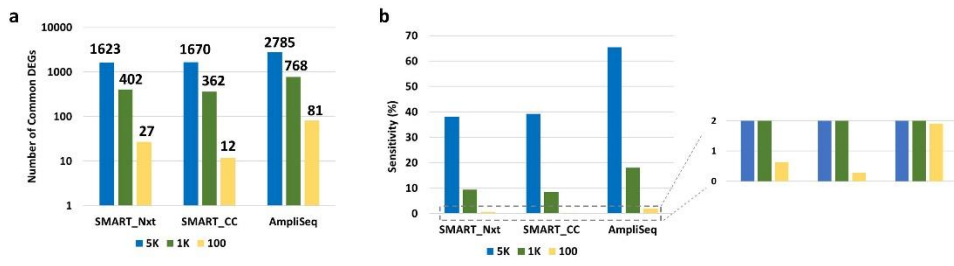

## Figure Legend

### Figure S1. Comparing RNA extraction methods with different cell inputs

(a) RNA extraction protocol comparison. CD4<sup>+</sup> T cells were extracted from three healthy donors. Cells gradients of 100 to 5,000 were used with 2-4 replicates each per RNA extraction method. (b) qRT-PCR showed consistent amplification of 1000 and 5000 cell input. At 100 cells input, the ct mean values for Qiagen remained consistent among replicates, across donors for both housekeeping genes, GAPDH and  $\beta$ -actin. Zymo extraction could not detect GAPDH in the majority of samples, while multiple replicates failed to amplify GAPDH with PicoPure extracted RNA.

### Figure S2. Number of detected genes decreased with reduced input in SMART technology, while it remained constant for AmpliSeq technology

(a) Alignment rates for samples at the four input cell gradients (100, 1K, 5K, 100K) for the three technologies. Bar plot shows mean +/- standard deviation of the replicates. (b). PCR duplication rates for samples at the four input cell gradients (100, 1K, 5K, 100K) for SMART\_Nxt and SMART\_CC from samples of  $\alpha$ -CD3+B7-1 Fc (left) or  $\alpha$ -CD3 (right) treatment. Bar plot shows mean +/- standard deviation of the replicates. (c) Venn diagram showing overlap of genes detected in the AmpliSeq panel and those annotated in UCSC hg19 database. (d) Number of gene detection (count>0) for samples at the four input cell gradients (100, 1K, 5K, 100K) for the three technologies. Bar plot shows the mean mapping percentage +/- standard deviation of the two replicates. (e) Collection curves showing the number of detected genes at different sequencing depths. Solid lines indicate the mean and shading regions indicate standard deviation. Black crossings indicate, for each sample, the sequencing depth where 90% of the



genes were detected. Dashed black lines indicate sampled library size for downstream analysis. (f) Number of detected genes, grouped into high, medium and low expressing genes. (g) Density plot showing the distribution of the log<sub>2</sub> transformed RPKM values in each cell input in SMART\_Nxt (left), SMART\_CC (middle), AmpliSeq (right). Minimum and maximum RPKM values at each cell input were also listed on the upper right of the plot. (h) Number of detected genes, grouped into short, medium and long transcripts. (i) Percentage of the reads that mapped to UCSC genes at the four input cell gradients (100, 1K, 5K, 100K) for SMART\_Nxt and SMART\_CC from samples of α-CD3+B7-1 Fc (left) or α-CD3 (right) treatment. Bar plot shows mean +/- standard deviation of the two replicates. (j) Number of detected non-UCSC genes at the four input cell gradients (100, 1K, 5K, 100K) for SMART\_Nxt and SMART\_CC from samples of α-CD3+B7-1 Fc (left) or α-CD3 (right) treatment. Bar plot shows mean +/- standard deviation of the two replicates. For Figure (a, d-h), samples from α-CD3 treatment were used.

**Figure S3. Consistency between technical replicates was high at cell input equal to or above 1K, and there was increased variability at 100 cell input**

(a) Heatmap showing the correlation of log<sub>2</sub> transformed count values (Blue indicates low correlation and red indicates high correlation). (b) Scatter plots showing the correlation between the two replicates for each cell gradient in each platform. R<sup>2</sup> indicates coefficient of determination. Samples from α-CD3 treatment were used.

**Figure S4. Consistency between different gradients was high at cell input equal to or above 1K, and the greatest impact was observed on the loss of low expressing genes at 100 cell input**

(a) Bar plot showing the correlation between samples from the 5K, 1K and 100 cell input to samples from the 100K cells for each platform. Replicate 1 was used for the calculation.  $R^2$  indicates coefficient of determination. (b) Scatter plot showing the correlation between samples from the 5K (top), 1K (middle), 100 (bottom) cells to samples from the 100K cells for each platform. Replicate 1 was used for the calculation.  $R^2$  indicates coefficient of determination. (c) Bar plot showing the correlation between samples from the 5K, 1K and 100 cell gradient to samples from the 100K cells for each platform, splitting into high, (d) medium and (e) low expressing genes. Replicate 1 was used for the calculation.  $R^2$  indicates coefficient of determination. In each figure, samples from  $\alpha$ -CD3 treatment were used.

**Figure S5. Three different platforms detected common differentially expressed genes; however platform specific detection was also observed**

(a) Percentage (upper triangle) and the absolute number (lower triangle) of differentially expressed genes that overlap between each pair of comparisons. The percentages were calculated as the number of overlapped DEGs divided by the number of DEGs from the comparison with a smaller number DEGs. (b). Fold correlation for SMART\_CC and SMART\_Nxt common DEGs

**Figure S6. Number of differentially expressed genes decreased with reduced input**

(a) Number of detected DEGs between  $\alpha$ -CD3 and  $\alpha$ -CD3 + B7-1-Fc at different cell inputs in each protocol using the common DEGs detected by all three protocols at 100K cells as reference (FDR<0.05). The absolute number of detected genes were shown

above each bar in the plot. (b) Sensitivity for detecting common DEGs at low input samples.

## **Supplemental Table 1-6**

Supplemental Table 1: qRT\_PCR validation for AmpliSeq specific DEGs

Supplemental Table 2: qRT\_PCR validation for SMART\_CC and AmpliSeq DEGs

Supplemental Table 3: qRT\_PCR validation for SMART\_CC specific DEGs

Supplemental Table 4: qRT\_PCR validation for SMART\_Nxt and AmpliSeq DEGs

Supplemental Table 5: qRT\_PCR validation for SMART\_Nxt and SMART\_CC DEGs

Supplemental Table 6: qRT\_PCR validation for SMART\_Nxt specific DEGs

**Supplemental Table 1**

| GeneID   | LogFC_2  |          |         | Type          | Fluidgm Fold change |
|----------|----------|----------|---------|---------------|---------------------|
|          | Ampliseq | Clontech | Nextera |               |                     |
| ARHGEF26 | -4.451   | -0.237   | -0.174  | ampliseq_only | 4.729711104         |
| ARHGEF35 | 2.778    | -0.116   | -0.214  | ampliseq_only | 0.070400418         |
| CACNA2D2 | -2.01    | -0.319   | -0.609  | ampliseq_only | 0.216487808         |
| CACNA2D4 | -2.725   | -0.255   | -0.345  | ampliseq_only | 0.403306269         |
| CCL3L3   | 8.098    | 0        | 0       | ampliseq_only | 3547.935556         |
| CRLF2    | 2.799    | 0        | 0.028   | ampliseq_only | 1575.137645         |
| ENTPD1   | 2.176    | 0.231    | 0.075   | ampliseq_only | 1734.013322         |
| FARP1    | 2.616    | -0.102   | 0.28    | ampliseq_only | 0.126832463         |
| FCRL3    | -2.07    | -0.509   | -0.652  | ampliseq_only | 2.53225905          |
| GRK4     | 5.384    | -0.508   | -0.547  | ampliseq_only | 0.975671779         |
| IKBKG    | 4.02     | 0.196    | 0.12    | ampliseq_only | 0.555741            |
| IL3RA    | 2.027    | 0.149    | 0.657   | ampliseq_only | 157.587791          |
| KIR3DL2  | 2.769    | 0.648    | 0.566   | ampliseq_only | 35.34443274         |
| LGALS9C  | -3.26    | 0.024    | -0.884  | ampliseq_only | 0.304111852         |
| MAK      | 2.316    | -0.013   | 0.464   | ampliseq_only | 195.6126115         |
| MDP1     | -4.833   | -0.123   | -0.126  | ampliseq_only | 0.714284957         |
| PPP1R2P3 | -4.368   | 0.005    | 0.071   | ampliseq_only | 0.000318083         |
| PTPN14   | 4.884    | 0.325    | -0.197  | ampliseq_only | 2416.565431         |
| RGS5     | -2.841   | -0.234   | 0.002   | ampliseq_only | 12.36557016         |
| SPDYA    | -4.62    | -0.333   | -0.337  | ampliseq_only | 33.51900148         |
| TERT     | -4.619   | 0.366    | 0.035   | ampliseq_only | 8.2107227           |
| USP17L5  | -2.736   | 0        | 0       | ampliseq_only | 0.018428531         |

~59% match

**Supplemental Table 2**

| GeneID | LogFC_2  |          |         | Type              | Fluidgm Fold change |
|--------|----------|----------|---------|-------------------|---------------------|
|        | Ampliseq | Clontech | Nextera |                   |                     |
| ABCA6  | -2.057   | -2.543   | 0.348   | clontech_ampliseq | 157.5708718         |
| CCR5   | 3.558    | 2.346    | 0.668   | clontech_ampliseq | 0.223984855         |
| HIPK4  | -2.229   | -3.013   | -0.365  | clontech_ampliseq | 0.312898872         |
| LIPH   | 6.74     | 2.686    | 0.673   | clontech_ampliseq | 2471.645148         |
| SRGAP1 | -3.562   | -2.298   | -0.459  | clontech_ampliseq | 0.126832463         |
| TEX29  | -2.321   | -2.183   | -0.458  | clontech_ampliseq | 0.910199088         |

~66% match

**Supplemental Table 3**

| GeneID  | LogFC_2  |          |         | Type          | Fluidgm Fold change |
|---------|----------|----------|---------|---------------|---------------------|
|         | Ampliseq | Clontech | Nextera |               |                     |
| ARSD    | -0.578   | -2.412   | -0.813  | clontech_only | 2.041292716         |
| CKAP2L  | 0.965    | -2.686   | -0.178  | clontech_only | 7.534788593         |
| ENPP3   | -0.663   | 2.513    | 0.899   | clontech_only | 73.92026442         |
| FAM64A  | -0.6     | -5.197   | -0.784  | clontech_only | 0.126832463         |
| FTH1P3  | 0.327    | -2.068   | -0.084  | clontech_only | 0.083361652         |
| GALNT8  | -0.508   | 4.87     | 0.035   | clontech_only | 0.927793753         |
| IQCA1   | 0.049    | -2.173   | -0.951  | clontech_only | 6.110590983         |
| JAKMIP2 | -0.743   | -2.364   | -0.538  | clontech_only | 26.64622903         |
| NOSTRIN | -0.857   | -3.014   | 0.033   | clontech_only | 0.775658733         |
| PHKA1   | -0.723   | -3.464   | -0.949  | clontech_only | 0.05186038          |
| POTEE   | 0        | 3.092    | 0.033   | clontech_only | 1.132802248         |
| SEMA5A  | -0.448   | -2.656   | -0.944  | clontech_only | 8.172515188         |
| SLC45A3 | -0.191   | -2.061   | -0.908  | clontech_only | 15.82384763         |
| TSPAN1  | -0.472   | -5.345   | -0.658  | clontech_only | 0.126832463         |

~50% match

**Supplemental Table 4**

| GeneID | LogFC_2  |          |         | Type             | Fluidgm Fold change |
|--------|----------|----------|---------|------------------|---------------------|
|        | Ampliseq | Clontech | Nextera |                  |                     |
| ACOT12 | -2.671   | -0.376   | -3.206  | nextera_ampliseq | 4.126932578         |
| CSF2RA | 3.9      | 0.869    | 4.875   | nextera_ampliseq | 20167.20544         |
| GPR156 | -2.18    | -0.659   | -2.394  | nextera_ampliseq | 255.6361657         |
| MPL    | 3.079    | 0.337    | 2.722   | nextera_ampliseq | 87.21847306         |
| PLOD2  | 3.34     | 0.995    | 2.264   | nextera_ampliseq | 707.0014277         |
| PROC   | 4.669    | 0.924    | 3.542   | nextera_ampliseq | 0.126832463         |
| TUBB2B | -6.632   | -0.592   | -2.921  | nextera_ampliseq | 0.015163991         |

~57% match



**Supplemental Table 5**

| GeneID  | LogFC_2  |          |         | Type             | Fluidgm Fold change |
|---------|----------|----------|---------|------------------|---------------------|
|         | Ampliseq | Clontech | Nextera |                  |                     |
| CCR8    | -0.894   | -3.764   | -2.444  | nextera_clontech | 0.328639365         |
| CLDN5   | 0        | 6.726    | 4.329   | nextera_clontech | 59.04443075         |
| DDAH1   | 0.05     | -2.64    | -2.729  | nextera_clontech | 350.542172          |
| GOS2    | 0.21     | 3.315    | 4.875   | nextera_clontech | 223.0889748         |
| GNG4    | 1.691    | 2.48     | 2.61    | nextera_clontech | 11.82291923         |
| IGF2BP3 | 1.424    | 2.136    | 1.668   | nextera_clontech | 168.6752421         |
| LRRC32  | 0        | 5.728    | 8.27    | nextera_clontech | 627.3610374         |
| MPP3    | -0.869   | -3.241   | -2.333  | nextera_clontech | 0.700955433         |
| MYLK    | 0.047    | 3.345    | 3.141   | nextera_clontech | 12595.5048          |
| NPC1L1  | -1.639   | -2.894   | -2.57   | nextera_clontech | 1975.647765         |
| PDGFRA  | 0        | 5.74     | 3.978   | nextera_clontech | 1223.588505         |
| SORBS1  | 0        | -2.471   | -2.833  | nextera_clontech | 0.158461889         |
| TBC1D8B | -1.459   | -2.841   | -1.292  | nextera_clontech | 24.85857359         |
| TMSB4Y  | -0.561   | -4.458   | -7.717  | nextera_clontech | 0.029909375         |
| TNFSF14 | 0        | 5.407    | 5.274   | nextera_clontech | 11204.03815         |
| TNS1    | 1.017    | 2.963    | 5.241   | nextera_clontech | 0.0463417           |
| ZBTB32  | 0.042    | 2.522    | 2.653   | nextera_clontech | 1.535469451         |

~76% match

**Supplemental Table 6**

| GeneID   | LogFC_2  |          |         | Type         | Fluidgm Fold change |
|----------|----------|----------|---------|--------------|---------------------|
|          | Ampliseq | Clontech | Nextera |              |                     |
| CPLX3    | -0.447   | 0.022    | -4.375  | nextera_only | 0.531113727         |
| NDUFA4L2 | 0.723    | 0.554    | 4.877   | nextera_only | 8.528112234         |
| PHEX     | -0.488   | 0.911    | 2.932   | nextera_only | 126.586083          |
| RDH16    | 0.477    | 0.307    | -2.904  | nextera_only | 176.3005933         |
| RPS26P11 | -0.482   | 0.355    | -5.027  | nextera_only | 0.095360996         |
| RUSC2    | 0.675    | -0.27    | -2.48   | nextera_only | 3.515482612         |
| SIGLEC9  | -0.196   | 0.478    | 2.402   | nextera_only | 2284.503158         |
| SNORA58  | 0.23     | 0.715    | 3.324   | nextera_only | 0.992248372         |
| YY2      | 0.103    | 0.985    | 2.22    | nextera_only | 1.936806054         |
| ZBTB8A   | -0.356   | -0.875   | 2.357   | nextera_only | 4.974363037         |
| ZNF221   | 0.577    | 0.705    | 2.234   | nextera_only | 1.208235059         |

~72% match
